# Supplementary material
Source: publisher figshare collection journal article supplement (https://acs.figshare.com/ndownloader/files/4020190)
Supplement: Supplementary file 1 [file 4020190]

**Supplementary Table 3. Quality control of the developed SRM-MS assay**

| Peptide sequence                                          | Precursor m/z<br>(charge state) | Fragments m/z<br>(charge state, ion type)      | Stability CV, %<br>(one sample*) | Stability CV, %<br>(all samples**) |
|-----------------------------------------------------------|---------------------------------|------------------------------------------------|----------------------------------|------------------------------------|
| <b>Dc-VTG2</b>                                            |                                 |                                                |                                  |                                    |
| QELTLVEVK                                                 | 529.8 (2+)                      | 688.4 (1+,y6) - 801.5 (1+,y7) - (930.6 (1+,y8) | 6.6 - 5.9 - 7.2                  | -                                  |
| QELTLVEV [Lys( <sup>13</sup> C6; <sup>15</sup> N2)]       | 533.8 (2+)                      | 696.4 (1+,y6) - 809.5 (1+,y7) - (938.6 (1+,y8) | 5.2 - 5.1 - 8.6                  | 8.7 - 11.8 - 11.4                  |
| VASPDLTLESVFK                                             | 646.8 (2+)                      | 518.3 (2+,y9) - 561.8 (2+,y10) - 823.5 (1+,y7) | 11.3 - 10.6 - 9.4                | -                                  |
| VASPDLTLESVF [Lys( <sup>13</sup> C6; <sup>15</sup> N2)]   | 650.8 (2+)                      | 522.3 (2+,y9) - 565.8 (2+,y10) - 831.5 (1+,y7) | 8.8 - 10.7 - 12.7                | 15.3 - 20.6 - 14.1                 |
| IQLEIQAGSR                                                | 557.8 (2+)                      | 631.4 (1+,y6) - 760.4 (1+,y7) - 873.5 (1+,y8)  | 8.4 - 5.7 - 8.6                  | -                                  |
| IQLEIQAGS [Arg( <sup>13</sup> C6; <sup>15</sup> N4)]      | 562.8 (2+)                      | 641.4 (1+,y6) - 770.4 (1+,y7) - 883.5 (1+,y8)  | 9.0 - 9.1 - 10.5                 | 1.0 - 5.9 - 3.5                    |
| ISSEVTGR                                                  | 498.3 (2+)                      | 708.4 (1+,y6) - 795.4 (1+,y7) - 882.4 (1+,y8)  | 8.7 - 9.5 - 9.5                  | -                                  |
| ISSEVTG [Arg( <sup>13</sup> C6; <sup>15</sup> N4)]        | 503.3 (2+)                      | 718.4 (1+,y6) - 805.4 (1+,y7) - 892.4 (1+,y8)  | 7.7 - 9.7 - 10.3                 | 19.0 - 19.6 - 20.0                 |
| <b>Dc-VTG1</b>                                            |                                 |                                                |                                  |                                    |
| MTPVLLPEAVPDIMK                                           | 827.5 (2+)                      | 542.3 (1+,b5) - 655.4 (1+,b6) - 711.4 (2+,y13) | 11.6 - 14.0 - 13.3               | -                                  |
| MTPVLLPEAVPDIM [Lys( <sup>13</sup> C6; <sup>15</sup> N2)] | 831.5 (2+)                      | 542.3 (1+,b5) - 655.4 (1+,b6) - 715.4 (2+,y13) | 17.1 - 7.8 - 15.6                | 10.4 - 7.0 - 15.3                  |

The SRM-MS signal stability over time was estimated by calculating the coefficients of variation for all fragment ions from four repeated injections of a randomly chosen sample (\*) spiked with a fixed amount of isotopically labeled peptides over ~1 week (i.e. throughout the entire duration of the experiment). Coefficients of variation were also calculated for fragment ions of the isotopically labeled peptides from all the individual injections (\*\*) carried out throughout the duration of the experiment, including those that served to establish the linearity standard curves (see Figure S5).
